# Supplementary material
Source: Elsevier journal article supplement (https://comptes-rendus.academie-sciences.fr/chimie/article/10.1016/j.crci.2009.01.007/file/attach/mmc1.pdf)
Supplement: mmc1 [file mmc1.pdf]

at constant rotation speed of 50 rotations per minutes (rpm) while the vanadium oxide gel was extruded out of its containing syringe at the 50 mL/h constant low flux. Upon extrusion process completion, the vanadium oxide threads were meticulously taken out of beaker by hand and let to dry in air. Finally the as-synthesized fibers were washed three times in THF/acetone (50 vol %) for a 1 day period and then let to dry in air.

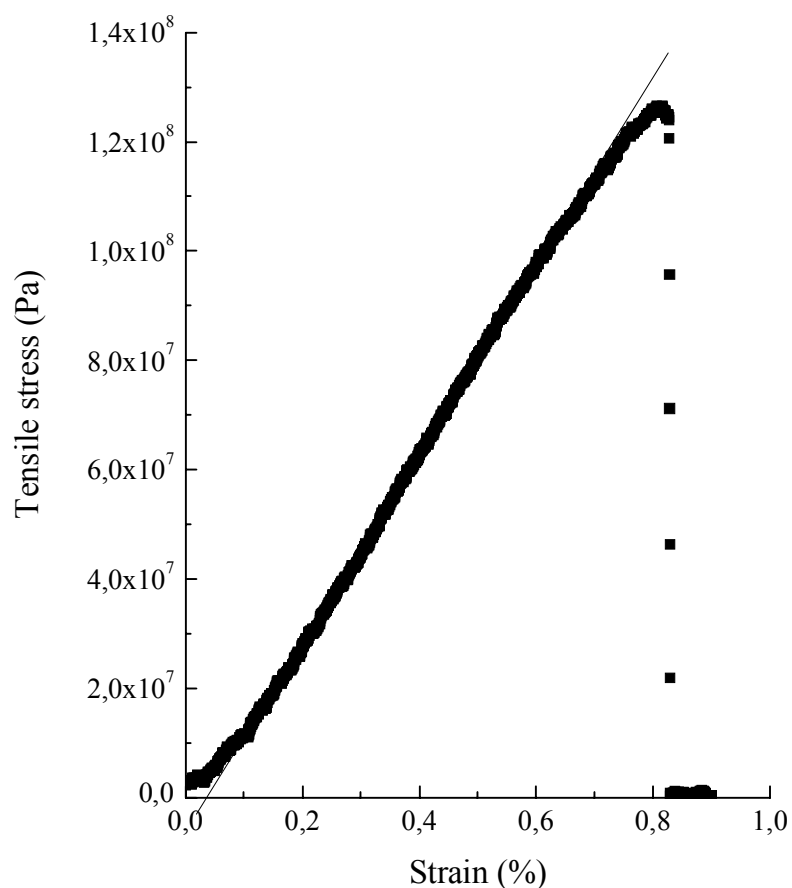

**Figure 1 (supplemental).** Vanadium oxide fibers mechanical properties. Measurements were performed at a strain rate of 0.5%. min<sup>-1</sup>. The modulus extracted at low deformation is about 17 Gpa..
